# Supplementary material for: Relevance of Neutrophil Neprilysin in Heart Failure
Source: MDPI journal article supplement (doi:10.3390/cells10112922), 2021-10-28
Supplement: s1 [file s1]

# SUPPLEMENTAL MATERIAL

## Supplemental Tables

**Table S1.** Baseline characteristics presented for the HFrEF, HFpEF and control group.

| Baseline characteristics             | HFrEF (n=228)       | HFpEF (n=30)        | Controls (n=43)     |
|--------------------------------------|---------------------|---------------------|---------------------|
| Age, median years (IQR)              | 64 (55 to 72)       | 76 (71 to 79)       | 35 (27 to 51)       |
| Male gender, n (%)                   | 169 (74)            | 8 (27)              | 19 (44)             |
| BMI, kg/m <sup>2</sup> (IQR)         | 28 (24 to 32)       | 27 (26 to 30)       | -                   |
| Systolic blood pressure, mmHg (IQR)  | 122 (110 to 140)    | 130 (119 to 146)    | -                   |
| Diastolic blood pressure, mmHg (IQR) | 75 (70 to 85)       | 80 (70 to 86)       | -                   |
| Heart rate, min <sup>-1</sup> (IQR)  | 69 (62 to 80)       | 72 (63 to 79)       | -                   |
| NYHA I, n (%)                        | 36 (16)             | 4 (13)              | 0 (0)               |
| NYHA II, n (%)                       | 97 (43)             | 12 (40)             | 0 (0)               |
| NYHA III, n (%)                      | 91 (40)             | 13 (43)             | 0 (0)               |
| NYHA IV, n (%)                       | 4 (2)               | 1 (3)               | 0 (0)               |
| <b>Comorbidities</b>                 |                     |                     |                     |
| Non-ischemic etiology of HF, n (%)   | 127 (56)            | -                   | 0 (0)               |
| Hypertension, n (%)                  | 130 (57)            | 23 (77)             | 0 (0)               |
| Type II diabetes mellitus, n (%)     | 76 (33)             | 5 (17)              | 0 (0)               |
| Atrial fibrillation, n (%)           | 81 (36)             | 16 (53)             | 0 (0)               |
| <b>Laboratory parameters</b>         |                     |                     |                     |
| Hemoglobin, g/dl (IQR)               | 13.5 (12.2 to 14.5) | 12.2 (11.1 to 13.7) | 13.8 (13.0 to 14.7) |
| WBC, G/l (IQR)                       | 7.14 (6.04 to 8.75) | 6.60 (5.31 to 8.23) | 5.68 (5.02 to 7.24) |
| Serum creatinine, mg/dl (IQR)        | 1.19 (0.91 to 1.66) | 1.20 (0.92 to 1.39) | 0.82 (0.67 to 0.93) |
| Blood urea nitrogen, mg/dl (IQR)     | 22.8 (16.7 to 33.7) | 23.4 (17.5 to 30.0) | 11.2 (9.0 to 14.3)  |
| Total cholesterol, mg/dl (IQR)       | 168 (134 to 192)    | 166 (133 to 188)    | 175 (154 to 204)    |
| C-reactive protein, mg/dl (IQR)      | 0.29 (0.14 to 0.85) | 0.31 (1.14 to 0.58) | 0.07 (0.03 to 0.15) |
| Total bilirubin, mg/dl (IQR)         | 0.60 (0.43 to 8.40) | 0.48 (0.32 to 0.95) | 0.50 (0.39 to 0.69) |
| BChE, U/l (IQR)                      | 7.07 (5.52 to 8.81) | 6.95 (5.36 to 8.06) | 7.45 (6.88 to 8.45) |

|                                                          |                      |                   |               |
|----------------------------------------------------------|----------------------|-------------------|---------------|
| NT-proBNP, pg/ml (IQR)                                   | 1819 (746 to 4264)   | 969 (554 to 1838) | 41 (24 to 75) |
| <b>Medication</b>                                        |                      |                   |               |
| Beta-blocker, n (%)                                      | 217 (95)             | 25 (83)           | 0 (0)         |
| Diuretics, n (%)                                         | 102 (45)             | 13 (43)           | 0 (0)         |
| Mineralocorticoid antagonist, n (%)                      | 180 (79)             | 12 (40)           | 0 (0)         |
| I <sub>f</sub> Inhibitor (%)                             | 21 (9)               | 1 (3)             | 0 (0)         |
| ACE-I/ARB/ARNI, n (%)                                    | 101/50/62 (44/22/27) | 4/11/0 (13/37/0)  | 0 (0)         |
| <b>Echocardiographic characteristics</b>                 |                      |                   |               |
| Left ventricular end-diastolic diameter, mm              | 58 (52 to 65)        | 45 (41 to 48)     | -             |
| Left ventricular function (≥ moderately reduced), n (%)  | 195 (86)             | 0                 | -             |
| Mitral regurgitation (≥ moderate), n (%)                 | 124 (54)             | 3 (10)            | -             |
| Right ventricular end-diastolic diameters, mm            | 37 (32 to 42)        | 35 (32 to 40)     | -             |
| Right ventricular function (≥ moderately reduced), n (%) | 82 (36)              | 0                 | -             |
| Tricuspid regurgitation (≥ moderate), n (%)              | 106 (46)             | 15 (50)           | -             |
| Systolic pulmonary artery pressure, mmHg                 | 48 (37 to 59)        | 51 (41 to 64)     | -             |

IQR – interquartile range, BMI – body mass index, NYHA – New York Heart Association, HF – heart failure, WBC – white blood count, BChE – butyrylcholinesterase, NT – proBNP – N-terminal pro-B-type-natriuretic peptide, ACE-I – angiotensin converting enzyme inhibitor, ARB – angiotensin II receptor blocker, ARNI – angiotensin receptor-neprilysin inhibitor

**Table S2.** Baseline characteristics presented for the HF<sub>r</sub>EF group stratified by heart failure etiology.

| Baseline characteristics             | non-ischemic CMP<br>(n=127) | ischemic CMP<br>(n=101) | p-value |
|--------------------------------------|-----------------------------|-------------------------|---------|
| Age, median years (IQR)              | 60 (47 to 69)               | 69 (61 to 75)           | <0.001  |
| Male gender, n (%)                   | 84 (66)                     | 85 (84)                 | 0.002   |
| Systolic blood pressure, mmHg (IQR)  | 130 (110 to 140)            | 120 (105 to 135)        | 0.105   |
| Diastolic blood pressure, mmHg (IQR) | 78 (70 to 90)               | 74 (70 to 80)           | 0.068   |
| BMI, kg/m <sup>2</sup> (IQR)         | 27 (24 to 32)               | 28 (24 to 32)           | 0.296   |
| NYHA functional class                |                             |                         | <0.001  |
| NYHA I, n (%)                        | 29 (23)                     | 7 (7)                   |         |
| NYHA II, n (%)                       | 58 (46)                     | 39 (39)                 |         |
| NYHA III, n (%)                      | 39 (31)                     | 52 (52)                 |         |

|                                  |                     |                     |        |
|----------------------------------|---------------------|---------------------|--------|
| NYHA IV, n (%)                   | 1 (1)               | 3 (3)               |        |
| <b>Comorbidities</b>             |                     |                     |        |
| Hypertension, n (%)              | 54 (43)             | 76 (75)             | <0.001 |
| Type II diabetes mellitus, n (%) | 25 (20)             | 51 (50)             | <0.001 |
| Atrial fibrillation, n (%)       | 42 (33)             | 39 (39)             | 0.355  |
| <b>Laboratory parameters</b>     |                     |                     |        |
| Hemoglobin, g/dl (IQR)           | 13.7 (12.6 to 14.9) | 13.3 (11.6 to 14.2) | 0.007  |
| WBC, G/l (IQR)                   | 7.27 (6.15 to 9.08) | 7.12 (5.84 to 8.61) | 0.331  |
| Serum creatinine, mg/dl (IQR)    | 1.07 (0.86 to 1.43) | 1.37 (1.06 to 1.79) | <0.001 |
| Total cholesterol, mg/dl (IQR)   | 173 (147 to 199)    | 158 (125 to 183)    | 0.003  |
| C-reactive protein, mg/dl (IQR)  | 0.27 (0.14 to 0.66) | 0.30 (1.14 to 1.05) | 0.253  |
| BChE, kU/l (IQR)                 | 7.42 (5.57 to 8.78) | 6.78 (5.27 to 8.91) | 0.173  |
| NT-proBNP, pg/ml (IQR)           | 1477 (594 to 3530)  | 2529 (924 to 5107)  | 0.003  |

CMP - cardiomyopathy, IQR – interquartile range, BMI – body mass index, NYHA – New York Heart Association, WBC – white blood count, BChE – butyrylcholinesterase, NT – proBNP – N-terminal pro-B-type-natriuretic peptide.

## Supplemental Figures

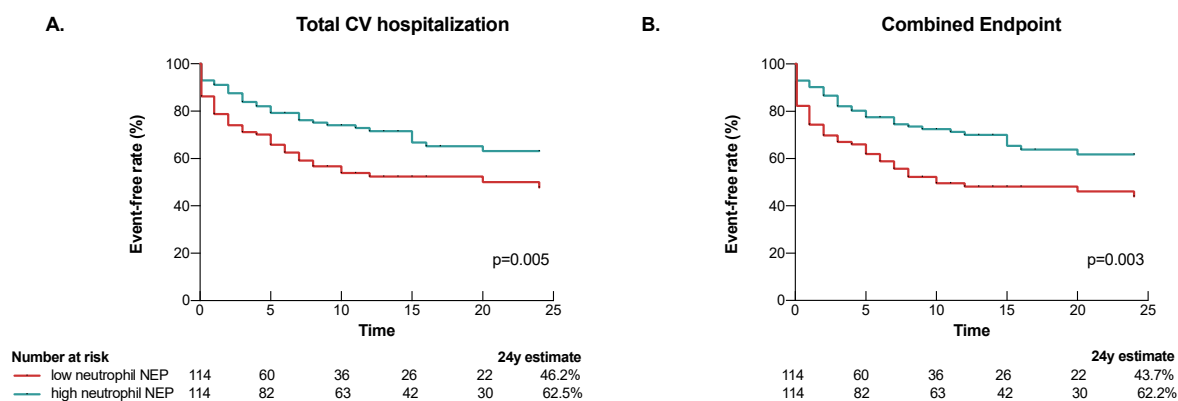

**Figure S1.** Kaplan-Meier curves for total cardiovascular (CV) hospitalizations (A) and the composite endpoint of all-cause mortality and total CV hospitalizations (B) in HFrEF patients. Low and high neutrophil NEP expression with the median MFI as the cut-off value. Comparison was calculated by the log-rank test.
